# Supplementary material for: The Effects of Age at Weaning and Length of Lipid Supplementation on Growth, Metabolites, and Marbling of Young Steers
Source: PubMed Central journal article supplement (PMC7600868; doi:10.3390/ani10101819), 2020-10-06
Supplement: animals-10-01819-s001.pdf [file animals-10-01819-s001.pdf]

**Supplemental Table 1.** Fatty acid composition of the rumen bypass lipid (RBL), Essentiom, corn gluten feed (CGF), and Bermuda grass hay fed to steers. All items except DM are presented on a DM basis

| Item                        | RBL, Essentiom, | CGF  | Bermuda hay |
|-----------------------------|-----------------|------|-------------|
| DM, %                       | 96.9            | 91.6 | 96.4        |
| Ether extract, %            | 84.5            | 5.2  | 2.3         |
| C12:0, %                    | 0.0             | 0.0  | 0.0         |
| C14:0, %                    | 0.0             | 0.0  | 0.0         |
| C16:0, %                    | 21.8            | 0.5  | 0.4         |
| C16:1, %                    | 0.0             | 0.0  | 0.0         |
| C18:0, %                    | 3.2             | 0.1  | 0.0         |
| C18:1 <i>t</i> , %          | 0.0             | 0.0  | 0.0         |
| C18:1 <i>c</i> , %          | 27.7            | 1.4  | 0.1         |
| C18:2, %                    | 26.2            | 3.1  | 0.4         |
| C18:3, %                    | 4.0             | 0.1  | 0.9         |
| Other LCFA <sup>1</sup> , % | 1.0             | 0.0  | 0.0         |

<sup>1</sup>Long Chain Fatty Acid (LCFA)
